# Supplementary material for: Hepatic Proteomic Analysis of Selenoprotein T Knockout Mice by TMT: Implications for the Role of Selenoprotein T in Glucose and Lipid Metabolism
Source: MDPI journal article supplement (doi:10.3390/ijms22168515), 2021-08-07
Supplement: s1 [file s1]

Table S1. Up-regulated hepatic DEPs in *Selenot*-KO mice

| Uniprot ID | Gene Name | Fold<br>Change<br>KO/WT | Protein Name                                                             | p value |
|------------|-----------|-------------------------|--------------------------------------------------------------------------|---------|
| P70227     | Itpr3     | 1.7142                  | Inositol 1,4,5-trisphosphate receptor type 3                             | 0.0193  |
| Q810C0     | Slitrk2   | 1.5838                  | SLIT and NTRK-like protein 2                                             | 0.0240  |
| Q99JH8     | Kdelr1    | 1.5758                  | ER lumen protein-retaining receptor 1                                    | 0.0344  |
| P19426     | Nelfe     | 1.5667                  | Negative elongation factor E                                             | 0.0003  |
| Q80V94     | Ap4e1     | 1.4803                  | AP-4 complex subunit epsilon-1                                           | 0.0019  |
| Q8C4X7     | Minar2    | 1.4486                  | Major intrinsically disordered NOTCH2-binding<br>receptor 1-like homolog | 0.0069  |
| Q8VCH0     | Acaa1b    | 1.4334                  | 3-ketoacyl-CoA thiolase B, peroxisomal                                   | 0.0057  |
| Q80X71     | Tmem106b  | 1.4200                  | Transmembrane protein 106B                                               | 0.0133  |
| P13516     | Scd1      | 1.4148                  | Acyl-CoA desaturase 1                                                    | 0.0033  |
| Q9CR30     | Josd2     | 1.3915                  | Josephin-2                                                               | 0.0100  |
| Q6P1E7     | Primpol   | 1.3635                  | DNA-directed primase/polymerase protein                                  | 0.0301  |
| Q9EQQ2     | Yipf5     | 1.3481                  | Protein YIPF5                                                            | 0.0472  |
| Q80ZJ8     | Cracr2b   | 1.3299                  | EF-hand calcium-binding domain-containing protein<br>4A                  | 0.0473  |
| E9Q2M9     | Wdfy4     | 1.3271                  | WD repeat- and FYVE domain-containing protein 4                          | 0.0395  |
| Q9JIA7     | Sphk2     | 1.3167                  | Sphingosine kinase 2                                                     | 0.0019  |
| Q8BGS7     | Cept1     | 1.3154                  | Choline/ethanolaminephosphotransferase 1                                 | 0.0014  |

|        |         |        |                                                    |        |
|--------|---------|--------|----------------------------------------------------|--------|
| Q9JMI0 | Ece1    | 1.3130 | Endothelin-converting enzyme-like 1                | 0.0143 |
| Q6P2L6 | Nsd3    | 1.3102 | Histone-lysine N-methyltransferase NSD3            | 0.0247 |
| Q02242 | Pdcd1   | 1.3066 | Programmed cell death protein 1                    | 0.0151 |
| Q920M5 | Coro6   | 1.2939 | Coronin-6                                          | 0.0038 |
| Q5SS00 | Zdbf2   | 1.2855 | DBF4-type zinc finger-containing protein 2 homolog | 0.0377 |
| Q9D413 | Sh2d6   | 1.2842 | SH2 domain-containing protein 6                    | 0.0117 |
| P10648 | Gsta2   | 1.2728 | Glutathione S-transferase A2                       | 0.0047 |
| P06801 | Me1     | 1.2721 | NADP-dependent malic enzyme                        | 0.0085 |
| O54909 | Rdh16   | 1.2688 | Retinol dehydrogenase 16                           | 0.0001 |
| Q5SWP3 | Nacad   | 1.2621 | NAC-alpha domain-containing protein 1              | 0.0117 |
| Q61907 | Pemt    | 1.2610 | Phosphatidylethanolamine N-methyltransferase       | 0.0011 |
| Q8VCB3 | Gys2    | 1.2594 | Glycogen [starch] synthase, liver                  | 0.0215 |
| Q80UG2 | Plxna4  | 1.2501 | Plexin-A4                                          | 0.0048 |
| Q9Z2H5 | Epb4111 | 1.2471 | Band 4.1-like protein 1                            | 0.0007 |
| Q4G5Y1 | Klhdc2  | 1.2464 | Kelch domain-containing protein 2                  | 0.0126 |
| Q99MZ3 | Mlxip1  | 1.2459 | Carbohydrate-responsive element-binding protein    | 0.0169 |
| Q8BMZ5 | Tsen34  | 1.2409 | tRNA-splicing endonuclease subunit Sen34           | 0.0085 |
| Q68FH4 | Galk2   | 1.2403 | N-acetylgalactosamine kinase                       | 0.0093 |
| Q61391 | Mme     | 1.2365 | Neprilysin                                         | 0.0002 |
| Q80ZU0 | Arl5a   | 1.2346 | ADP-ribosylation factor-like protein 5A            | 0.0475 |
| Q0GA42 | Cnnm1   | 1.2343 | Metal transporter CNNM1                            | 0.0471 |
| Q8CFA2 | Amt     | 1.2309 | Aminomethyltransferase, mitochondrial              | 0.0056 |

---

|        |           |        |                                                                |        |
|--------|-----------|--------|----------------------------------------------------------------|--------|
| Q8CH72 | Trim32    | 1.2266 | E3 ubiquitin-protein ligase TRIM32                             | 0.0164 |
| Q14DH7 | Acss3     | 1.2259 | Acyl-CoA synthetase short-chain family member 3, mitochondrial | 0.0130 |
| Q9DBE0 | Csad      | 1.2245 | Cysteine sulfinic acid decarboxylase                           | 0.0196 |
| P0DP99 | Stmp1     | 1.2244 | Short transmembrane mitochondrial protein 1                    | 0.0252 |
| P00329 | Adh1      | 1.2242 | Alcohol dehydrogenase 1                                        | 0.0058 |
| P24472 | Gsta4     | 1.2202 | Glutathione S-transferase A4                                   | 0.0075 |
| Q91ZR5 | Catsper1  | 1.2177 | Cation channel sperm-associated protein 1                      | 0.0473 |
| O09117 | Sypl1     | 1.2175 | Synaptophysin-like protein 1                                   | 0.0407 |
| O54992 | Mapkapk5  | 1.2153 | MAP kinase-activated protein kinase 5                          | 0.0268 |
| Q91YA2 | Pskh1     | 1.2141 | Serine/threonine-protein kinase H1                             | 0.0231 |
| P56565 | S100a1    | 1.2111 | Protein S100-A1                                                | 0.0255 |
| P07309 | Ttr       | 1.2099 | Transthyretin                                                  | 0.0004 |
| Q5D1E7 | Zc3h12a   | 1.2084 | Endoribonuclease ZC3H12A                                       | 0.0015 |
| Q64522 | Hist2h2ab | 1.2063 | Histone H2A type 2-B                                           | 0.0473 |
| Q9QXN0 | Shroom3   | 1.2062 | Protein Shroom3                                                | 0.0034 |
| Q9Z0H4 | Celf2     | 1.2052 | CUGBP Elav-like family member 2                                | 0.0067 |
| Q8VCT4 | Ces1d     | 1.2039 | Carboxylesterase 1D                                            | 0.0195 |
| Q9ES28 | Arhgef7   | 1.2038 | Rho guanine nucleotide exchange factor 7                       | 0.0123 |
| Q4ZJM7 | Otol1     | 1.2029 | Otolin-1                                                       | 0.0128 |
| Q91VC9 | Ghitm     | 1.2018 | Growth hormone-inducible transmembrane protein                 | 0.0318 |
| Q8R1R3 | Stard7    | 1.2011 | StAR-related lipid transfer protein 7, mitochondrial           | 0.0007 |

---

|        |      |        |                               |        |
|--------|------|--------|-------------------------------|--------|
| Q91VF2 | Hnmt | 1.2011 | Histamine N-methyltransferase | 0.0275 |
|--------|------|--------|-------------------------------|--------|

Table S2. Down-regulated hepatic DEPs in *Selenot*-KO mice

| Uniprot ID | Gene Name | Fold<br>Change<br>KO/WT | Protein Name                                           | p value |
|------------|-----------|-------------------------|--------------------------------------------------------|---------|
| Q8C1B7     | Sept11    | 0.8315                  | Septin-11                                              | 0.0260  |
| Q9CQS8     | Sec61b    |                         | Protein transport protein Sec61 subunit beta           |         |
| Q61704     | Itih3     | 0.8309                  | Inter-alpha-trypsin inhibitor heavy chain H3           | 0.0040  |
| Q3TC93     | Hs1bp3    | 0.8292                  | HCLS1-binding protein 3                                | 0.0201  |
| A6X935     | Itih4     | 0.8290                  | Inter alpha-trypsin inhibitor, heavy chain 4           | 0.0280  |
| Q8C754     | Vps52     | 0.8287                  | Vacuolar protein sorting-associated protein 52 homolog | 0.0041  |
| P16294     | F9        | 0.8276                  | Coagulation factor IX                                  | 0.0201  |
| Q8K182     | C8a       | 0.8273                  | Complement component C8 alpha chain                    | 0.0332  |
| P31001     | Des       | 0.8272                  | Desmin                                                 | 0.0163  |
| Q3UJB9     | Edc4      | 0.8263                  | Enhancer of mRNA-decapping protein 4                   | 0.0243  |
| Q00623     | Apoa1     | 0.8260                  | Apolipoprotein A-I                                     | 0.0207  |
| Q8BH61     | F13a1     | 0.8257                  | Coagulation factor XIII A chain                        | 0.0147  |
| P51658     | Hsd17b2   | 0.8248                  | Estradiol 17-beta-dehydrogenase 2                      | 0.0008  |
| Q9JKS5     | Habp4     | 0.8241                  | Intracellular hyaluronan-binding protein 4             | 0.0043  |
| Q64378     | Fkbp5     | 0.8233                  | Peptidyl-prolyl cis-trans isomerase FKBP5              | 0.0000  |

---

|        |           |        |                                                           |        |
|--------|-----------|--------|-----------------------------------------------------------|--------|
| Q80X80 | C2cd2l    | 0.8224 | Phospholipid transfer protein C2CD2L                      | 0.0008 |
| Q8CH25 | Sltm      | 0.8217 | SAFB-like transcription modulator                         | 0.0116 |
| Q8BND5 | Qsox1     | 0.8208 | Sulfhydryl oxidase 1                                      | 0.0051 |
| Q9D115 | Znf706    | 0.8187 | Zinc finger protein 706                                   | 0.0047 |
| Q8BM55 | Tmem214   | 0.8179 | Transmembrane protein 214                                 | 0.0452 |
| Q6ZWY8 | Tmsb10    | 0.8172 | Thymosin beta-10                                          | 0.0011 |
| Q9JJ00 | Plscr1    | 0.8136 | Phospholipid scramblase 1                                 | 0.0442 |
| Q8C0L9 | Gpcpd1    | 0.8113 | Glycerophosphocholine phosphodiesterase GPCPD1            | 0.0345 |
| Q9CY24 | Tmem179b  | 0.8111 | Transmembrane protein 179B                                | 0.0112 |
| Q8BRH0 | Tmtc3     | 0.8101 | Transmembrane and TPR repeat-containing protein 3         | 0.0085 |
| Q5I012 | Slc38a10  | 0.8095 | Putative sodium-coupled neutral amino acid transporter 10 | 0.0004 |
| Q9D7S7 | Rpl22l1   | 0.8056 | 60S ribosomal protein L22-like 1                          | 0.0198 |
| Q5NBU8 | Xaf1      | 0.8055 | XIAP-associated factor 1                                  | 0.0005 |
| Q8BHJ6 | Serinc5   | 0.8055 | Serine incorporator 5                                     | 0.0162 |
| P15379 | Cd44      | 0.8034 | CD44 antigen                                              | 0.0306 |
| Q91WP6 | Serpina3n | 0.8015 | Serine protease inhibitor A3N                             | 0.0420 |
| Q8R2E9 | Ero1b     | 0.8015 | ERO1-like protein beta                                    | 0.0025 |
| P01796 |           | 0.8009 | Ig heavy chain V-III region A4                            | 0.0430 |
| Q60590 | Orm1      | 0.8006 | Alpha-1-acid glycoprotein 1                               | 0.0289 |
| P06339 | H2-T23    | 0.8004 | H-2 class I histocompatibility antigen, D-37 alpha chain  | 0.0271 |

---

|        |         |        |                                                         |        |
|--------|---------|--------|---------------------------------------------------------|--------|
| P62342 | Selenot | 0.8002 | Thioredoxin reductase-like selenoprotein T              | 0.0275 |
| Q8BWR8 | Rhpn2   | 0.7994 | Rhopilin-2                                              | 0.0021 |
| Q99KX1 | Mlf2    | 0.7993 | Myeloid leukemia factor 2                               | 0.0061 |
| Q3UDW8 | Hgsnat  | 0.7991 | Heparan-alpha-glucosaminide N-acetyltransferase         | 0.0491 |
| Q9ES56 | Trappc4 | 0.7990 | Trafficking protein particle complex subunit 4          | 0.0008 |
| P20152 | Vim     | 0.7969 | Vimentin                                                | 0.0045 |
| Q61153 | Dio1    | 0.7951 | Type I iodothyronine deiodinase                         | 0.0460 |
| Q68FF9 | Srd5a1  | 0.7951 | 3-oxo-5-alpha-steroid 4-dehydrogenase 1                 | 0.0063 |
| Q80X50 | Ubp2l   | 0.7949 | Ubiquitin-associated protein 2-like                     | 0.0022 |
| Q810A3 | Ttc9c   | 0.7941 | Tetratricopeptide repeat protein 9C                     | 0.0303 |
| Q9WVB0 | Rbpms   | 0.7908 | RNA-binding protein with multiple splicing              | 0.0322 |
| P31532 | Saa4    | 0.7904 | Serum amyloid A-4 protein                               | 0.0159 |
| Q91WE4 |         | 0.7888 | UPF0729 protein C18orf32 homolog                        | 0.0349 |
| O08692 | Ngp     | 0.7887 | Neutrophilic granule protein                            | 0.0182 |
| Q8BLX4 | Slc35c1 | 0.7885 | GDP-fucose transporter 1                                | 0.0469 |
| Q62481 | Vps72   | 0.7881 | Vacuolar protein sorting-associated protein 72 homolog  | 0.0326 |
| Q8BHC0 | Lyve1   | 0.7858 | Lymphatic vessel endothelial hyaluronic acid receptor 1 | 0.0180 |
| Q8K0R6 | Gltpd2  | 0.7851 | Glycolipid transfer protein domain-containing protein 2 | 0.0181 |
| O54786 | Dffa    | 0.7848 | DNA fragmentation factor subunit alpha                  | 0.0023 |

|        |           |        |                                                               |        |
|--------|-----------|--------|---------------------------------------------------------------|--------|
| Q6NWW9 | Fndc3b    | 0.7839 | Fibronectin type III domain-containing protein 3B             | 0.0437 |
| P23440 | Pde6b     | 0.7805 | Rod cGMP-specific 3',5'-cyclic phosphodiesterase subunit beta | 0.0208 |
| P51885 | Lum       | 0.7788 | Lumican                                                       | 0.0336 |
| Q9DCT8 | Crip2     | 0.7785 | Cysteine-rich protein 2                                       | 0.0420 |
| Q3UIR3 | Dtx3l     | 0.7773 | E3 ubiquitin-protein ligase DTX3L                             | 0.0092 |
| Q9JI90 | Rnf14     | 0.7767 | E3 ubiquitin-protein ligase RNF14                             | 0.0377 |
| Q9QXM0 | Abhd2     | 0.7760 | Monoacylglycerol lipase ABHD2                                 | 0.0003 |
| P56873 | Sssca1    | 0.7760 | Sjogren syndrome/scleroderma autoantigen 1 homolog            | 0.0021 |
| Q9D1M7 | Fkbp11    | 0.7722 | Peptidyl-prolyl cis-trans isomerase FKBP11                    | 0.0103 |
| P14873 | Map1b     | 0.7683 | Microtubule-associated protein 1B                             | 0.0432 |
| P63254 | Crip1     | 0.7677 | Cysteine-rich protein 1                                       | 0.0194 |
| Q00898 | Serpina1e | 0.7626 | Alpha-1-antitrypsin 1-5                                       | 0.0206 |
| O88904 | Hipk1     | 0.7591 | Homeodomain-interacting protein kinase 1                      | 0.0061 |
| Q80YT7 | Pde4dip   | 0.7554 | Myomegalin                                                    | 0.0003 |
| P08207 | S100a10   | 0.7548 | Protein S100-A10                                              | 0.0287 |
| Q80UY2 | Kcmf1     | 0.7537 | E3 ubiquitin-protein ligase KCMF1                             | 0.0158 |
| Q6P8I4 | Pcnp      | 0.7511 | PEST proteolytic signal-containing nuclear protein            | 0.0005 |
| P27005 | S100a8    | 0.7499 | Protein S100-A8                                               | 0.0214 |
| P11087 | Colla1    | 0.7482 | Collagen alpha-1(I) chain                                     | 0.0393 |
| P51437 | Camp      | 0.7419 | Cathelicidin antimicrobial peptide                            | 0.0190 |

|        |          |        |                                         |        |
|--------|----------|--------|-----------------------------------------|--------|
| Q61646 | Hp       | 0.7401 | Haptoglobin                             | 0.0418 |
| Q71KU9 | Fgl1     | 0.7342 | Fibrinogen-like protein 1               | 0.0267 |
| Q01149 | Col1a2   | 0.7313 | Collagen alpha-2(I) chain               | 0.0054 |
| P11588 | Mup1     | 0.7303 | Major urinary protein 1                 | 0.0464 |
| A2AAE1 | Kiaa1109 | 0.7279 | Uncharacterized protein KIAA1109        | 0.0259 |
| C0HKD8 | Mfap1a   | 0.7176 | Microfibrillar-associated protein 1A    | 0.0002 |
| Q8BL00 | Cdhr3    | 0.7118 | Cadherin-related family member 3        | 0.0243 |
| Q1ERP8 | Cd300lg  | 0.7068 | CMRF35-like molecule 9                  | 0.0384 |
| Q61245 | Col11a1  | 0.7067 | Collagen alpha-1(XI) chain              | 0.0078 |
| Q91Y47 | F11      | 0.7040 | Coagulation factor XI                   | 0.0253 |
| Q91WR5 | Akr1c21  | 0.7019 | Aldo-keto reductase family 1 member C21 | 0.0166 |
| P97315 | Csrp1    | 0.6954 | Cysteine and glycine-rich protein 1     | 0.0391 |
| Q9D304 | Rnf128   | 0.6938 | E3 ubiquitin-protein ligase RNF128      | 0.0049 |
| P09602 | Hmgn2    | 0.6922 | Non-histone chromosomal protein HMG-17  | 0.0214 |
| P28654 | Dcn      | 0.6919 | Decorin                                 | 0.0339 |
| Q9QY24 | Zbp1     | 0.6706 | Z-DNA-binding protein 1                 | 0.0435 |
| P14602 | Hspb1    | 0.6493 | Heat shock protein beta-1               | 0.0057 |
| A2ASS6 | Ttn      | 0.6033 | Titin                                   | 0.0182 |
| Q63836 | Selenbp2 | 0.5763 | Selenium-binding protein 2              | 0.0045 |
| P02802 | Mt1      | 0.5208 | Metallothionein-1                       | 0.0019 |

Table S3. Statistically significant pathways in KEGG pathway analysis of the DEPs in livers of *Selenot*-KO and WT mice.



| Pathway Name                                        | P value | P value_<br>adjusted | Genes Fold<br>change                                                                    | Count | First class                          | Secondary class                           |
|-----------------------------------------------------|---------|----------------------|-----------------------------------------------------------------------------------------|-------|--------------------------------------|-------------------------------------------|
| <b>Biosynthesis of unsaturated fatty acids</b>      | 0.0213  | 0.33                 | Acaa1b 1.43;<br>Scd1 1.415                                                              | 2     | Metabolism                           | Lipid metabolism                          |
| <b>Glycerophospholipid metabolism</b>               | 0.0318  | 0.358                | Cept1 1.315;<br>Pemt 1.261;<br>Gpcpd1 0.811                                             | 3     | Metabolism                           | Lipid metabolism                          |
| <b>Fatty acid degradation</b>                       | 0.0485  | 0.501                | Acaa1b 1.43;<br>Adh1 1.224                                                              | 2     | Metabolism                           | Lipid metabolism                          |
| <b>Metabolism of xenobiotics by cytochrome P450</b> | 0.0117  | 0.224                | Gsta2 1.273;<br>Adh1 1.224;<br>Gsta4 1.22                                               | 3     | Metabolism                           | Xenobiotics biodegradation and metabolism |
| <b>Drug metabolism - cytochrome P450</b>            | 0.0126  | 0.224                | Gsta2 1.273;<br>Adh1 1.224;<br>Gsta4 1.22                                               | 3     | Metabolism                           | Xenobiotics biodegradation and metabolism |
| <b>ECM-receptor interaction</b>                     | 0.0241  | 0.332                | Cd44 0.801;<br>Col1a1 0.742;<br>Col1a2 0.73                                             | 3     | Environmental Information Processing | Signaling molecules and interaction       |
| <b>Complement and coagulation cascades</b>          | 0.00048 | 0.0598               | F9 0.827;<br>C8a 0.827;<br>F13a1 0.825;<br>Serpina1e 0.759;<br>F11 0.702                | 5     | Organismal Systems                   | Immune system                             |
| <b>PPAR signaling pathway</b>                       | 0.00338 | 0.133                | Acaa1b 1.43;<br>Scd1 1.415;<br>Me1 1.272;<br>Apoa1 0.826                                | 4     | Organismal Systems                   | Endocrine system                          |
| <b>Protein digestion and absorption</b>             | 0.00429 | 0.133                | Mme1 1.236;<br>Col1a1 0.742;<br>Col1a2 0.73;<br>Col11a1 0.704                           | 4     | Organismal Systems                   | Digestive system                          |
| <b>Proteoglycans in cancer</b>                      | 0.00313 | 0.133                | Itrp3 1.714;<br>Cd44 0.801;<br>Lum 0.779;<br>Col1a1 0.742;<br>Col1a2 0.73;<br>Dcn 0.671 | 6     | Human Diseases                       | Cancer: overview                          |
| <b>Chemical carcinogenesis</b>                      | 0.0294  | 0.358                | Gsta2 1.273;<br>Adh1 1.224;<br>Gsta4 1.22                                               | 3     | Human Diseases                       | Cancer: overview                          |
| <b>Amoebiasis</b>                                   | 0.00678 | 0.168                | C8a 0.827;<br>Col1a1 0.742;<br>Col1a2 0.73;                                             | 4     | Human Diseases                       | Infectious disease: parasitic             |

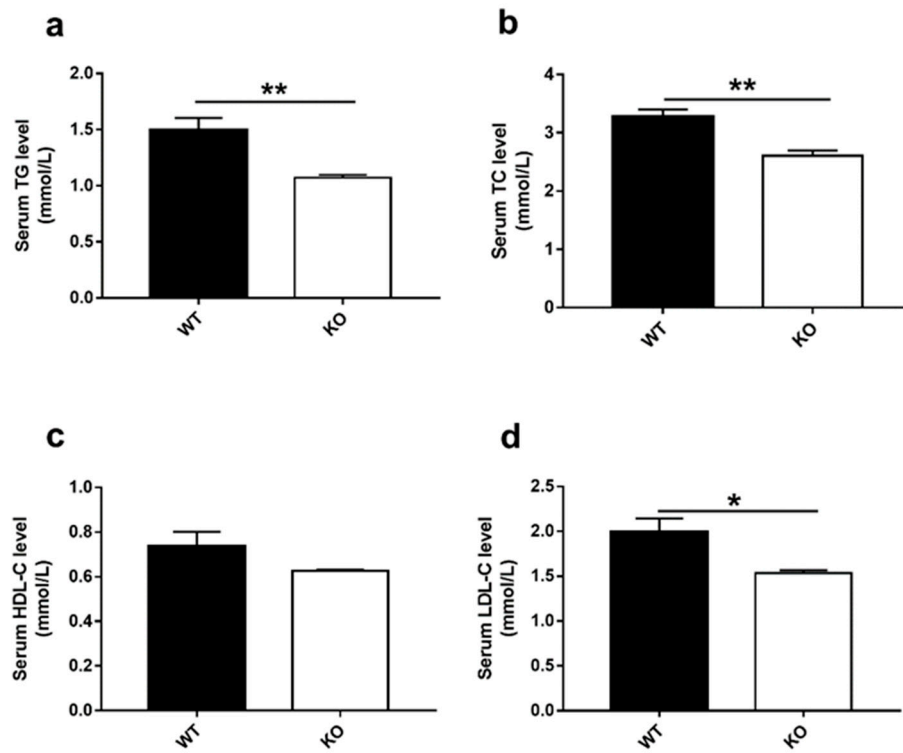

Figure S1. Serum TG, TC, HDL-C, LDL-C levels in male WT and *Selenot*-KO mice. All data are means  $\pm$  SEM (n = 5-7). \*  $p < 0.05$ , \*\*  $p < 0.01$ ; ANOVA followed by a mann-whitney nonparametric  $U$  test.
